# Supplementary material for: Long-term cardiovascular prognosis of patients with type 1 diabetes after myocardial infarction
Source: PubMed Central journal article supplement (PMC9450422; doi:10.1186/s12933-022-01608-3), 2022-09-06
Supplement: 12933_2022_1608_MOESM1_ESM.pdf [file 12933_2022_1608_MOESM1_ESM.pdf]

**Additional file 1****Additional Methods**

Outcome definitions:

- Major adverse cardiovascular event: Cardiovascular death, recurrent myocardial infarction hospitalization, ischemic stroke hospitalization, or heart failure hospitalization
- Cardiovascular death: ICD-10 code I\* as the underlying cause of death
- Recurrent myocardial infarction hospitalization: ICD-10 code I21\* or I22\* as the primary diagnosis in hospital admission
- Ischemic stroke hospitalization: ICD-10 code I63\* as any diagnosis in hospital admission
- Heart failure hospitalization: ICD-10 code I50\* as primary diagnosis in hospital admission

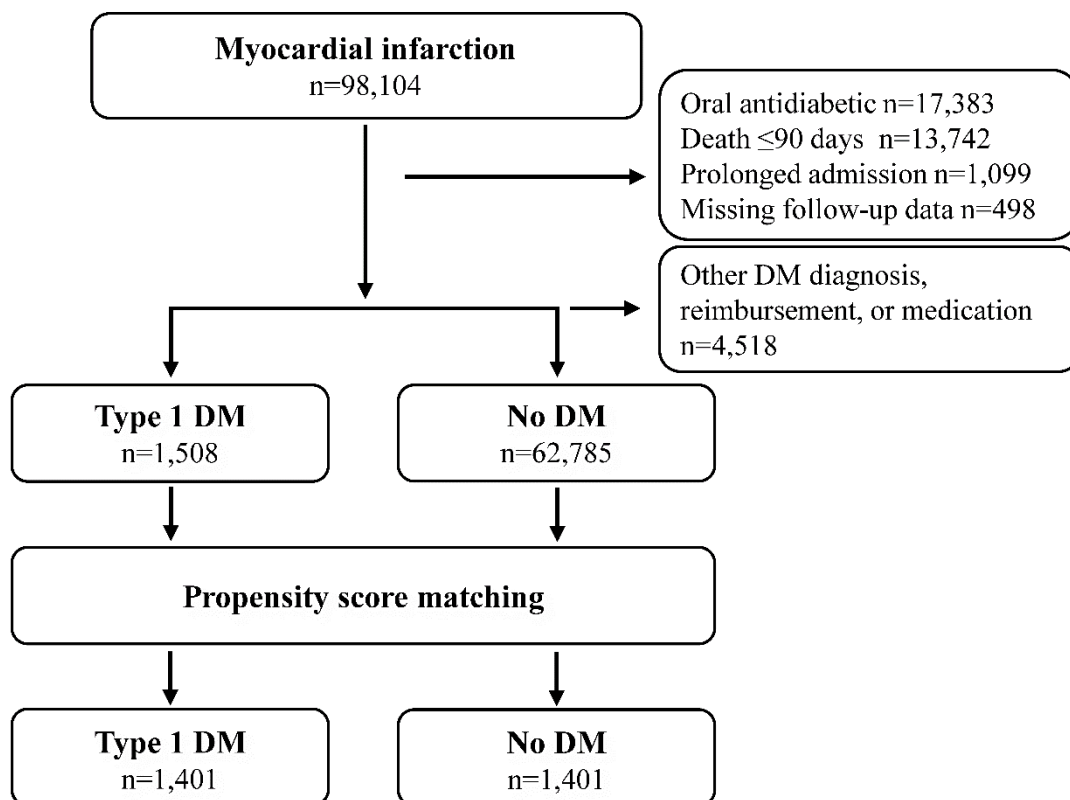

**Figure S1.** Study flow-chart.

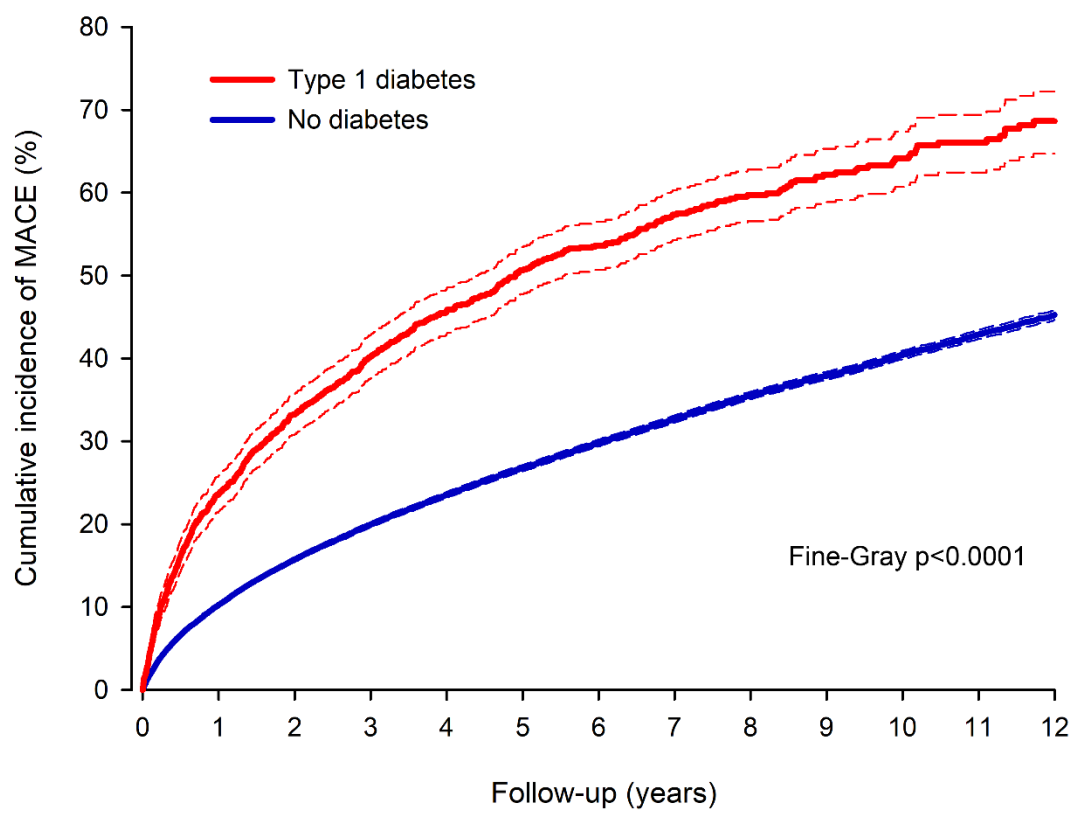

**Figure S2.** Cumulative incidence of major adverse cardiovascular event (MACE) after myocardial infarction in patients with type 1 diabetes and in unmatched control patients without any type of diabetes. Dashed lines represent 95% confidence intervals.

| Outcome event                   | All patients |        | Matched patients |       |
|---------------------------------|--------------|--------|------------------|-------|
|                                 | T1DM         | No DM  | T1DM             | No DM |
| MACE                            | 754          | 18,955 | 683              | 427   |
| Cardiovascular death            | 411          | 10,943 | 378              | 233   |
| Recurrent myocardial infarction | 361          | 14,350 | 327              | 185   |
| Ischemic stroke                 | 146          | 3,944  | 131              | 88    |
| Heart failure hospitalization   | 279          | 6,088  | 257              | 143   |

**Table S1.** Number of outcome events during 12-year follow-up.

| Outcome                                | Cumulative incidence |             | Univariable      |         | Multivariable    |         |
|----------------------------------------|----------------------|-------------|------------------|---------|------------------|---------|
|                                        | Type 1 Diabetes      | No Diabetes | sHR (95%CI)      | P-value | sHR (95%CI)      | P-value |
| <b>MACE</b>                            | 68.4%                | 45.3%       | 2.18 (2.02-2.35) | <0.0001 | 2.22 (2.02-2.43) | <0.0001 |
| <b>Cardiovascular death</b>            | 40.4%                | 28.3%       | 1.83 (1.66-2.03) | <0.0001 | 1.83 (1.66-2.03) | <0.0001 |
| <b>Recurrent myocardial infarction</b> | 33.6%                | 16.8%       | 2.40 (2.16-2.67) | <0.0001 | 2.13 (1.89-2.40) | <0.0001 |
| <b>Ischemic stroke</b>                 | 13.5%                | 10.0%       | 1.65 (1.40-1.95) | <0.0001 | 1.71 (1.43-2.04) | <0.0001 |
| <b>Heart failure hospitalization</b>   | 25.5%                | 14.8%       | 2.15 (1.90-2.42) | <0.0001 | 2.28 (1.98-2.63) | <0.0001 |

**Table S2.** Cumulative incidences of outcomes in the total study cohort during the 12-year follow-up.

Results of unadjusted and multivariable adjusted Fine-Gray models (see methods for details). sHR = subdistribution hazard ratio.

| Follow-up<br>(years) | Type 1 diabetes / No diabetes |                    |           |             |
|----------------------|-------------------------------|--------------------|-----------|-------------|
|                      | MACE                          | Competing<br>event | Censored  | At risk     |
| <b>0</b>             | 0 / 0                         | 0 / 0              | 0 / 0     | 1401 / 1401 |
| <b>2</b>             | 423 / 236                     | 53 / 41            | 170 / 209 | 755 / 915   |
| <b>4</b>             | 552 / 330                     | 79 / 67            | 321 / 390 | 449 / 614   |
| <b>6</b>             | 617 / 373                     | 93 / 78            | 415 / 529 | 276 / 421   |
| <b>8</b>             | 655 / 399                     | 99 / 85            | 502 / 649 | 145 / 268   |
| <b>10</b>            | 672 / 414                     | 103 / 93           | 543 / 756 | 83 / 138    |
| <b>12</b>            | 683 / 427                     | 106 / 94           | 612 / 880 | 35 / 48     |

**Table S3.** Number of major adverse cardiovascular events (MACE), competing events (non-cardiovascular death), censored patients, and patients at risk during follow-up of patients with type 1 diabetes and of matched control patients without any type of diabetes after myocardial infarction.

Please refer to Figure 1.
